# Supplementary material for: Exogenous proteinogenic amino acids induce systemic resistance in rice
Source: PubMed Central journal article supplement (PMC4778346; doi:10.1186/s12870-016-0748-x), 2016-03-03
Supplement: 12870_2016_748_MOESM3_ESM.pdf [file 12870_2016_748_MOESM3_ESM.pdf]

1 **Additional file 3. PCR primers**

| Gene            | Gene name / function                    | Locus ID     | Forward primer (5'-3')   | Reverse primer (5'-3')   | Reference            |
|-----------------|-----------------------------------------|--------------|--------------------------|--------------------------|----------------------|
| <b>OsWRKY45</b> | <i>Transcription factor</i>             | Os05g0322900 | CGGGTAAAACGATCGAAAGA     | TTTCGAAAGCGGAAGAACAG     | Shimono et al. 2007  |
| <b>OsPR1b</b>   | <i>Pathogenesis related protein</i>     | Os01g0382000 | ACGGGCGTACGTACTGGCTA     | CTCGGTATGGACCGTGAAG      | Shimono et al. 2007  |
| <b>UBQ</b>      | <i>Ubiquitin</i>                        | Os06g0681400 | GTGGTGGCCAGTAAGTCCTC     | GGACACAATGATTAGGGATCA    | Shimono et al. 2007  |
| <b>OsCOMT1</b>  | <i>Caffeic acid O-methyltransferase</i> | Os08g0157500 | AGGTGTTGACCATCGTCTT      | CACCGGAATTGAACATCAAA     | Shimizu et al.. 2012 |
| <b>eEF-1a</b>   | <i>Elongation factor</i>                | Os03g0177500 | TTTCACTCTTGGTGTGAAGCAGAT | GACTTCCTTCACGATTCATCGTAA | Jain et al. 2006     |
| <b>OsKSL4</b>   | <i>kaurene synthase-like</i>            | Os04g0179700 | CGCCTTTGTAAGTCTAAGGTA    | ACGTAAAAGGCTTGATATC      | Okada et al. 2009    |
| <b>OsCht3</b>   | <i>Chitinase</i>                        | Os06g0726100 | AGCTATGGCGATAACCTGGA     | TCGTCTGCTCGGATCAAATA     | This study           |

2
